# Supplementary material for: GCAM-GLORY v1.0: Representing Global Reservoir Water Storage in a Multisector Human-Earth System Model
Source: Copernicus journal article supplement (doi:10.5194/gmd-2023-204), 2023-12-06
Supplement: Supplementary file 1 [file gmd-2023-204-supplement.pdf]

# GCAM-GLORY v1.0: Representing Global Reservoir Water Storage in a Multisector Human-Earth System Model

Mengqi Zhao<sup>1</sup>, Thomas B. Wild<sup>2</sup>, Neal T. Graham<sup>2</sup>, Son Kim<sup>2</sup>, Matthew Binsted<sup>2</sup>, AFM Kamal Chowdhury<sup>3</sup>, Siwa Msangi<sup>4</sup>, Pralit L. Patel<sup>2</sup>, Chris Vernon<sup>1</sup>, Hassan Niazi<sup>2</sup>, Hong-Yi Li<sup>5</sup>, Guta Abeshu<sup>5</sup>

<sup>1</sup>Pacific Northwest National Laboratory, Richland, 99354, United States  
<sup>2</sup>Joint Global Change Research Institute, Pacific Northwest National Laboratory, College Park, 20740, United States  
<sup>3</sup>Earth System Science Interdisciplinary Center, University of Maryland, College Park, 20740, United States  
<sup>4</sup>Economic Research Service, U.S. Department of Agriculture, Washington DC, 20250, United States  
<sup>5</sup>Department of Civil and Environmental Engineering, University of Houston, Houston, 77204, United States

Correspondence to: Mengqi Zhao ([mengqi.zhao@pnnl.gov](mailto:mengqi.zhao@pnnl.gov))

## 1. Review of Reservoir Storage Representation in Global Multi-Sector Dynamics (MSD) Models

Table S1. Review of reservoir storage representation in selected global MSD models that incorporate concepts of water resources.

| Model             | Hydrologic Model | Water Availability <sup>1</sup> | Water Supply <sup>2</sup> | Water Demand <sup>3</sup> | Reservoir Storage Representation | Reservoir Classification | Reservoir Expansion | Citation                                           |
|-------------------|------------------|---------------------------------|---------------------------|---------------------------|----------------------------------|--------------------------|---------------------|----------------------------------------------------|
| AIM-Hub           | H08              | Exogenous                       | Exogenous                 | Endogenous                | Yes                              | Yes                      | No                  | (Masui et al., 2011)                               |
| ANEMIS            | None             | Endogenous                      | Endogenous                | Endogenous                | No                               | No                       | No                  | (Breach and Simonovic, 2021)                       |
| GCAM              | Xanthos          | Exogenous                       | Endogenous                | Endogenous                | No                               | No                       | No                  | (Calvin et al., 2019; Kim et al., 2016)            |
| REMIND-MAgPIE     | LPJmL            | Exogenous                       | Endogenous                | Exogenous                 | No                               | No                       | No                  | (Baumstark et al., 2021; Mouratiadou et al., 2016) |
| IGSM-WRS          | CLM              | Endogenous                      | Endogenous                | Endogenous                | Yes                              | No                       | No                  | (Strzepek et al., 2013)                            |
| IMAGE-LPJmL       | LPJmL            | Endogenous                      | Endogenous                | Endogenous                | Yes                              | Yes                      | No                  | (Stehfest et al., 2014)                            |
| MESSAGEix-GLOBIOM | CWatM            | Exogenous                       | Endogenous                | Endogenous                | No                               | No                       | No                  | (Krey et al., 2020; Fricko et al., 2016)           |

<sup>1</sup>water availability is the maximum available renewable and non-renewable water for human related activities.  
<sup>2</sup>water supply is the amount of water supplied to the demand sectors from the available water.  
<sup>3</sup>water demand is the amount of water demanded from the demand sectors.

2. Cost – Slope Relationship

20 Table S2. Estimated normalized unit cost – mean slope relationships for various size classes of storage capacity (Wiberg and Strzepek, 2005).

| Size Class | Storage Capacity<br>(million m³) | Normalized Unit Cost Equation (function of mean slope)<br>(Cost per m³) |
|------------|----------------------------------|-------------------------------------------------------------------------|
| I          | 0 – 25                           | $y = 0.0197x^2 + 0.0538x + 0.5818$                                      |
| II         | 25 – 49                          | $y = 0.0295x^2 - 0.0044x + 0.4456$                                      |
| III        | 49 – 74                          | $y = 0.0340x^2 - 0.0310x + 0.3982$                                      |
| IV         | 74 – 123                         | $y = 0.0370x^2 - 0.0521x + 0.3655$                                      |
| V          | 123 – 247                        | $y = 0.0372x^2 - 0.0607x + 0.3094$                                      |
| VI         | 247 – 493                        | $y = 0.0368x^2 - 0.0671x + 0.2633$                                      |
| VII        | 493 – 1,233                      | $y = 0.0372x^2 - 0.0607x + 0.3094$                                      |
| VIII       | 1,233 – 2,467                    | $y = 0.0362x^2 - 0.0824x + 0.1895$                                      |
| IX         | 2,467 – 4,934                    | $y = 0.0368x^2 - 0.0671x + 0.2633$                                      |
| X          | 4,934 – 12,335                   | $y = 0.0334x^2 - 0.0868x + 0.1427$                                      |
| XI         | > 12,335                         | $y = 0.0314x^2 - 0.0896x + 0.1111$                                      |

3. Runoff and Demand Patterns

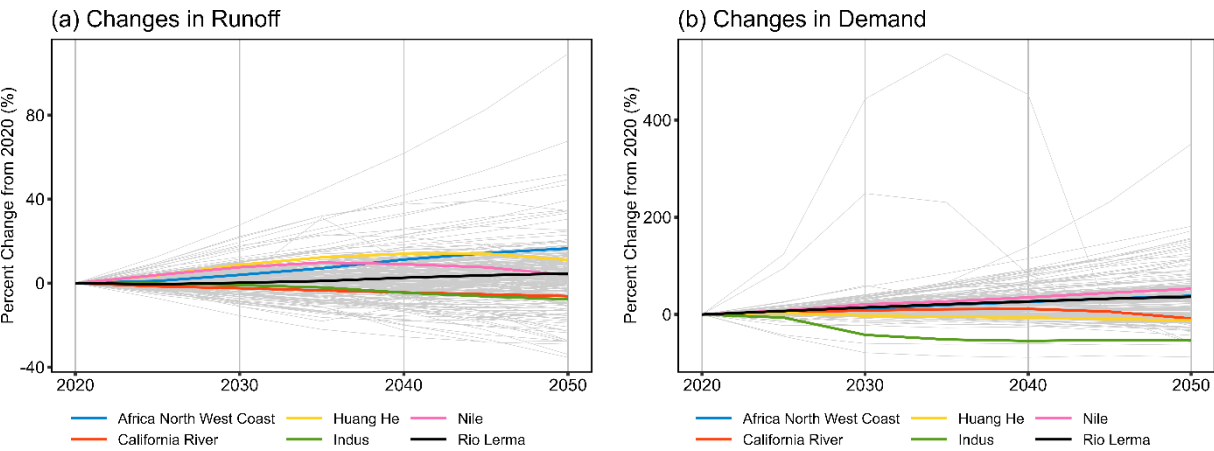

Figure S1. Percent change of (a) annual runoff and (b) annual demand (with feedback) from 2020 for global 235 basins under the selected climate change forcing. Six example basins are highlighted.

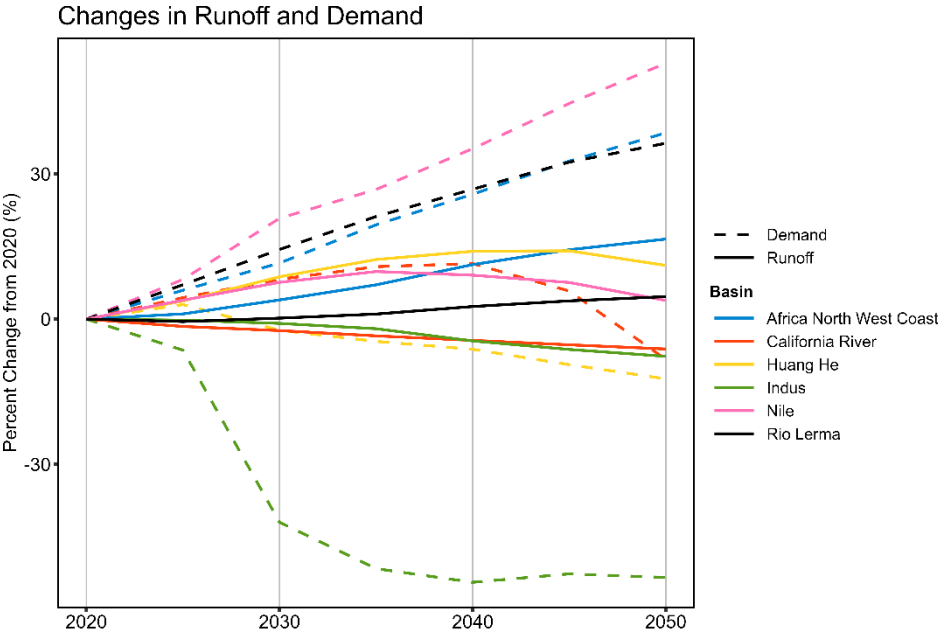

Figure S2. Relative change in both annual natural runoff (solid lines) and demand (dashed lines) in the Feedbacks scenario from 2020.

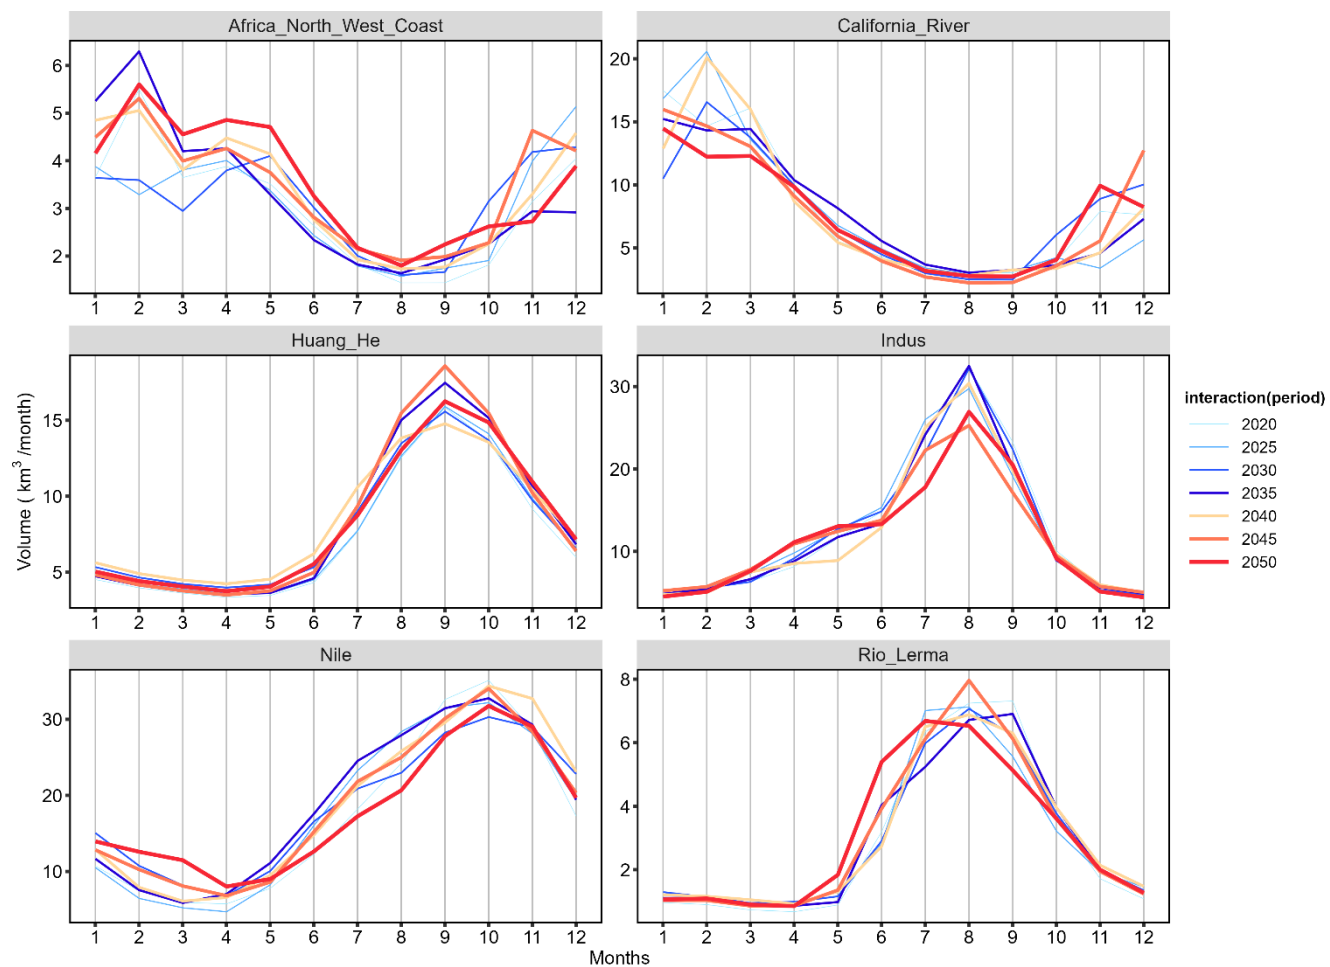

**Figure S3. Monthly runoff from 2020 to 2050 for selected basins.**

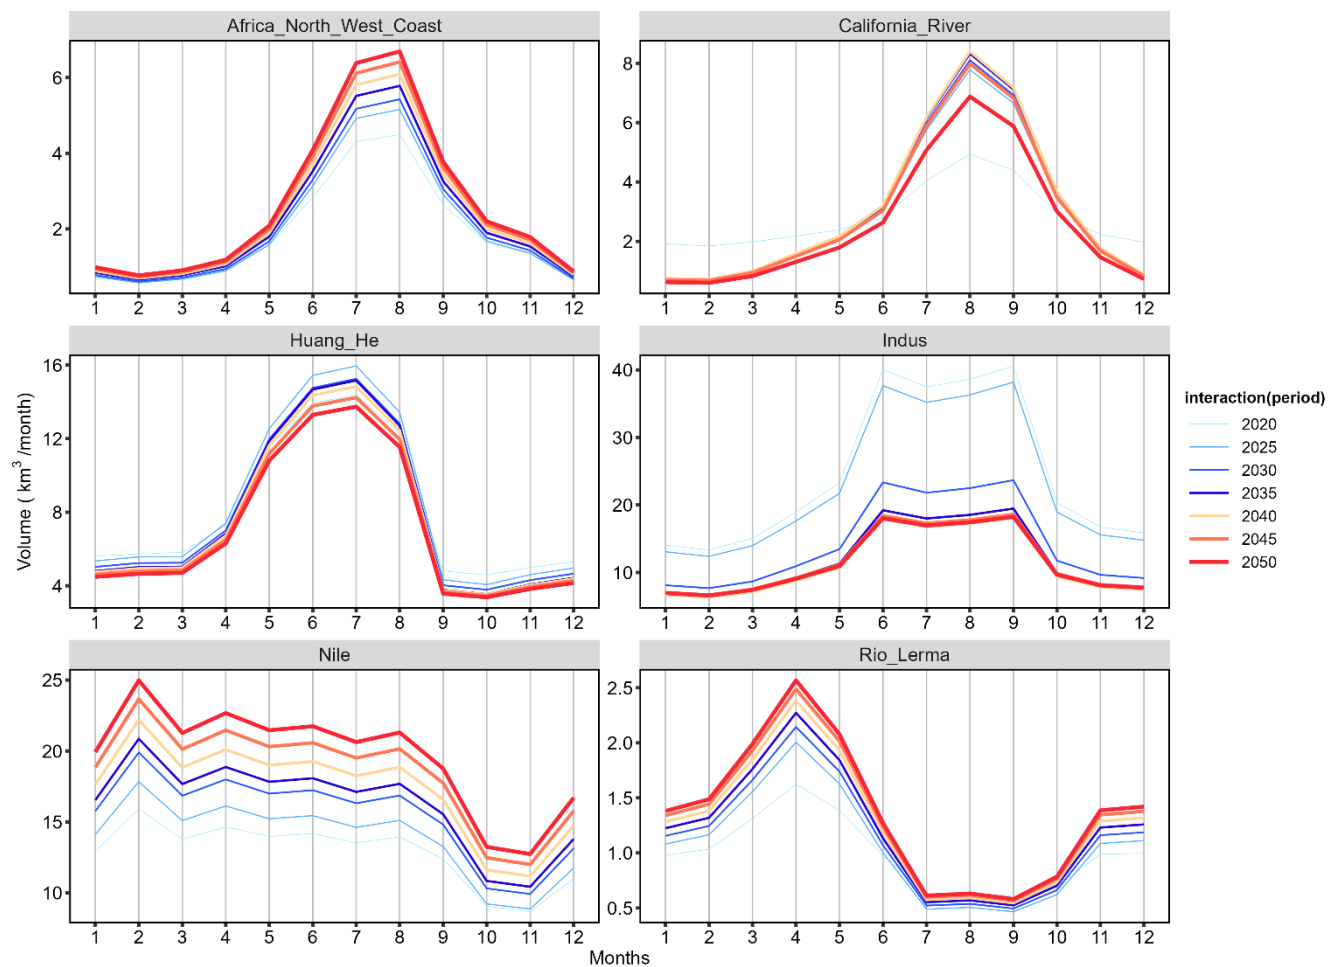

35 **Figure S4. Monthly demand shifts from 2020 to 2050 under *Feedbacks* scenario for selected basins. For *No Feedbacks* scenario, monthly demand for all periods is the same with the monthly demand in 2020.**

4. Excluded Grid Cells for Reservoir Expansion

To standardize disparate data formats and resolutions, we homogenized population, protected areas, irrigated croplands, and water bodies data. Employing techniques like rasterization, aggregation, and geo-referencing, we unified all layers to a consistent 0.5-degree resolution. The initial population data, at 0.125-degree resolution, underwent density calculations within grid cells, followed by mean-based aggregation to achieve the 0.5-degree resolution. Bilinear resampling was then applied to align population density with the target coordinate system. Similarly, protected area data, initially in shapefile format, was rasterized to 0.125-degree resolution. Utilizing a binary representation for presence, grid cells were labeled as 1 if any protected land existed, employing the "nearest neighbour" method during resampling. Irrigated cropland data, already at 0.5-degree resolution and within the target coordinate system, required no additional adjustments. Global lakes and wetlands data, originally at 30 arcsecond (~0.00833 degree) resolution, designated different water body types as numerical labels. Focusing on types 1, 2, and 3 (lakes, reservoirs, and rivers), corresponding grid cells were marked as binary 1. The raster was then aggregated to 0.5-degree targeted coordinate system using max values.

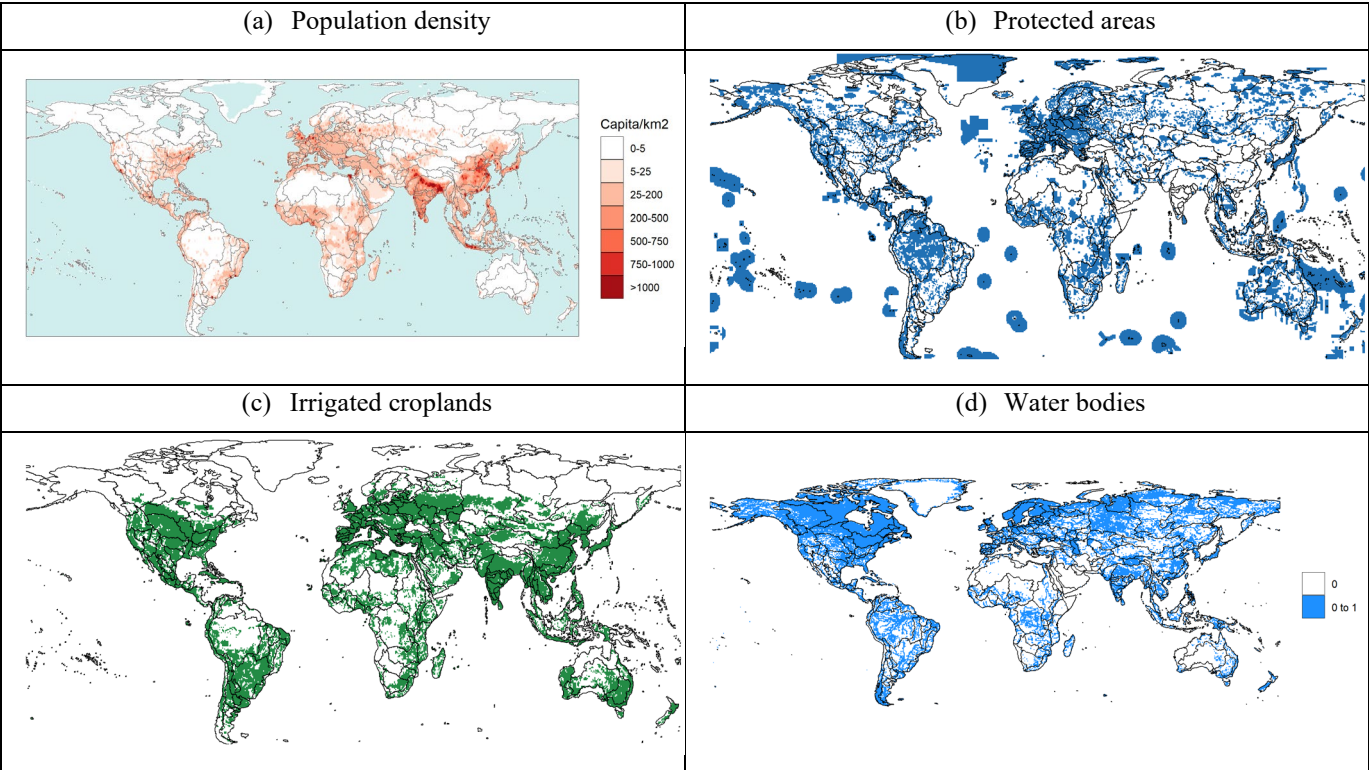

Figure S5. Exclusion layers using four criteria: (1) population density for the grid cell is higher than 1,244 capita per km<sup>2</sup>; (2) the grid cell has protected land; (3) more than 10% of the land cover within the grid cell is crop land; and (4) no water bodies exist in the grid cell.

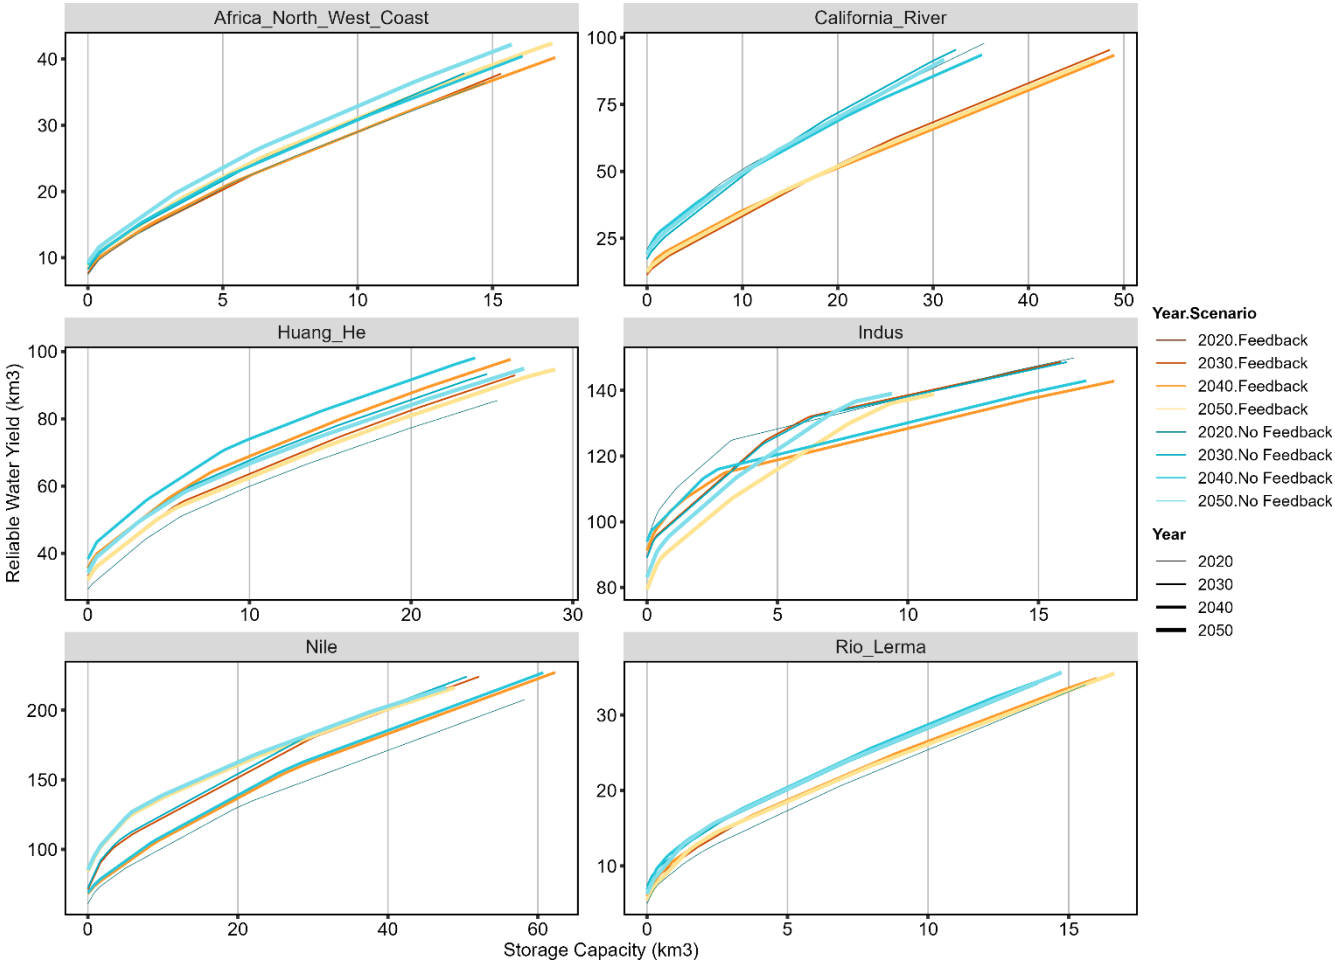

Figure S6. Capacity – Yield curves for 2020 – 2050 at 10-year interval for selected basins for *Feedback* and *No Feedback* scenarios.

6. Reservoir Storage – Surface Area Relationship

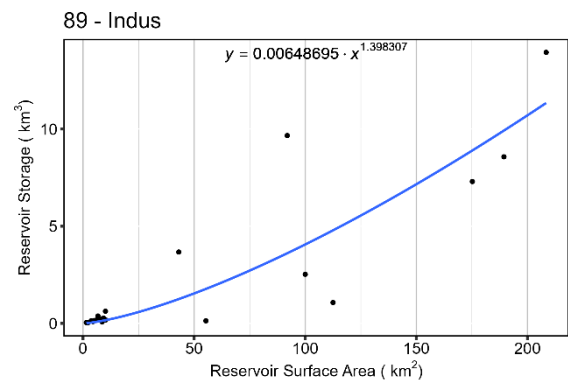

Figure S7. Example of non-linear relationship between storage capacity and reservoir surface area in Indus.

7. Cause and Effect

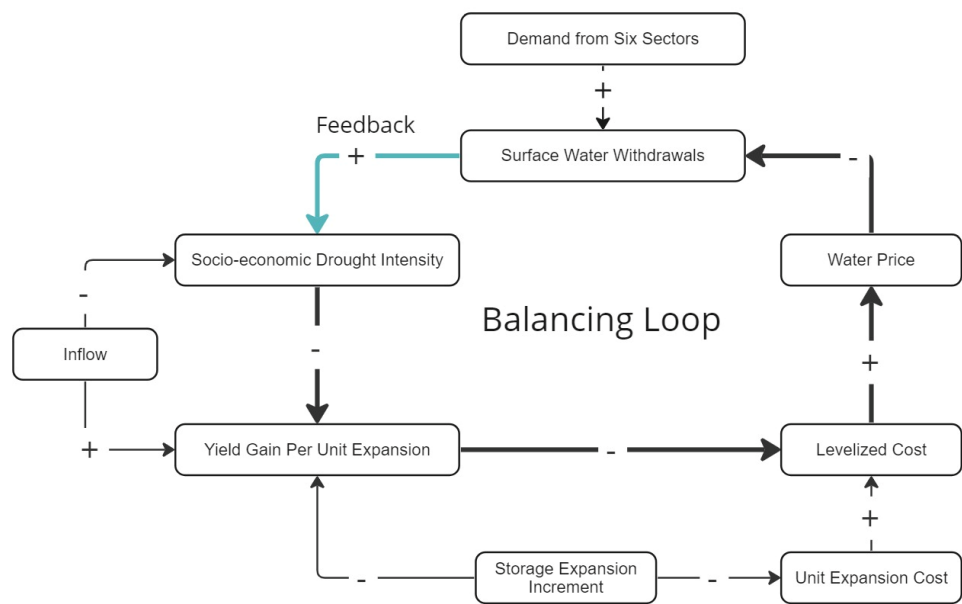

65 Figure S8. Causal loop diagram of metrics and drivers. The “+” sign means the two variables are positively related, and the “-” sign means the two variables are negatively related. The thick arrows are part of the balancing loop. A balancing loop is formed when there are odd numbers of “-” signs in a loop.

8. Reservoir Expansion Pathway

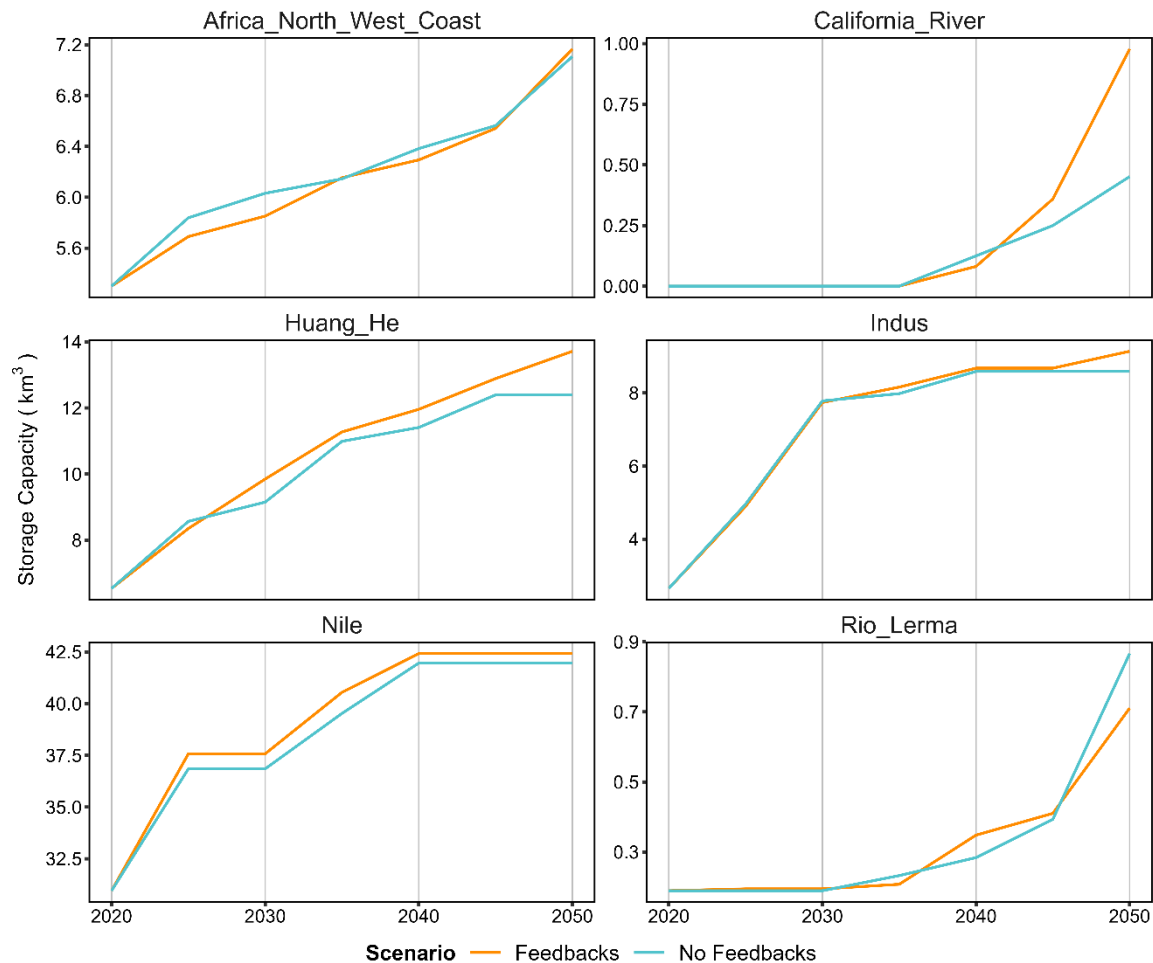

70 **Figure S9. Minimum reservoir storage capacity expansion pathways for example basins. This storage capacity is back-calculated using GCAM solved withdrawal and capacity-yield curve for each GCAM period. The corresponding storage capacity indicated the minimum value required to supply the amount of demand. However, this value can be smaller than existing non-hydropower reservoir storage capacity.**

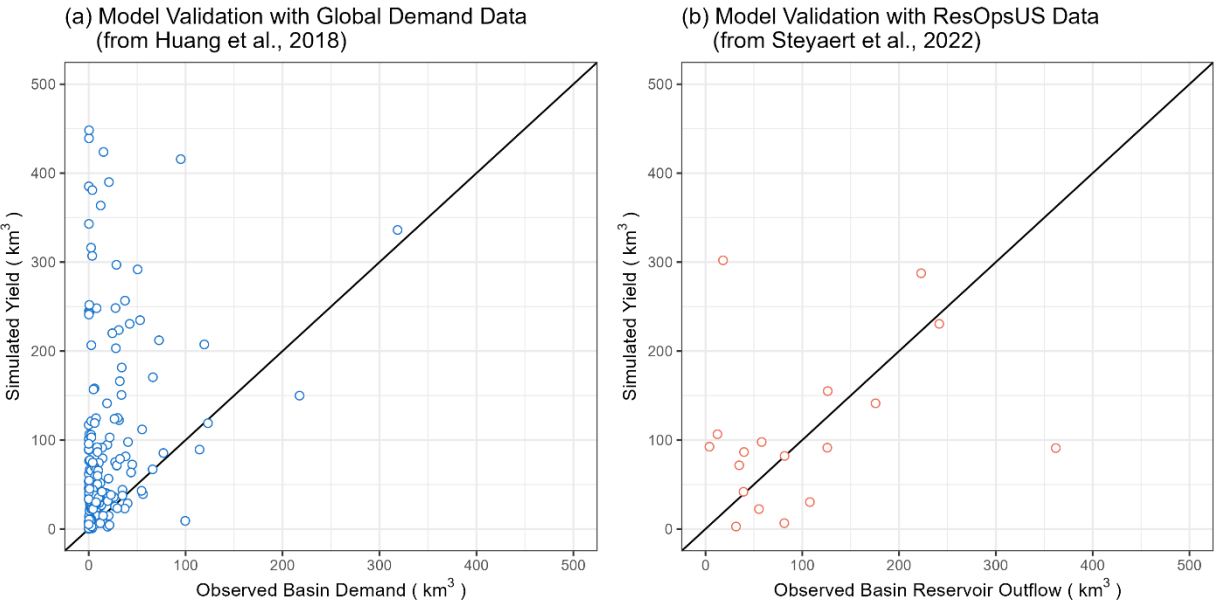

80 **Figure S10. (a) Historical annual water demand in 2010 (Huang et al., 2018) vs. simulated water yield at basin level; the simulated basin yield from reservoirs are mostly above the observed demand indicating the fact that the firm yield served as an upper bound of water demand. (b) historical reservoir outflow in 2010 (Steyaert et al., 2022) vs. simulated water yield at basin level within the U.S. The simulated yield is expected to be similar to outflow of reservoirs.**

## 10. References

- Baumstark, L., Bauer, N., Benke, F., Bertram, C., Bi, S., Gong, C. C., Dietrich, J. P., Dirnaichner, A., Giannousakis, A., Hilaire, J., Klein, D., Koch, J., Leimbach, M., Levesque, A., Madeddu, S., Malik, A., Merfort, A., Merfort, L., Odenweller, A., Pehl, M., Pietzcker, R. C., Piontek, F., Rauner, S., Rodrigues, R., Rottoli, M., Schreyer, F., Schultes, A., Soergel, B., Soergel, D., Strefler, J., Ueckerdt, F., Kriegler, E., and Luderer, G.: REMIND2.1: transformation and innovation dynamics of the energy-economic system within climate and sustainability limits, *Geoscientific Model Development*, 14, 6571–6603, <https://doi.org/10.5194/gmd-14-6571-2021>, 2021.
- 85 Breach, P. A. and Simonovic, S. P.: ANEMI3: An updated tool for global change analysis, *PLOS ONE*, 16, e0251489, <https://doi.org/10.1371/journal.pone.0251489>, 2021.
- 90 Calvin, K., Patel, P., Clarke, L., Asrar, G., Bond-Lamberty, B., Cui, R. Y., Di Vittorio, A., Dorheim, K., Edmonds, J., Hartin, C., Hejazi, M., Horowitz, R., Iyer, G., Kyle, P., Kim, S., Link, R., McJeon, H., Smith, S. J., Snyder, A., Waldhoff, S., and Wise, M.: GCAM v5.1: representing the linkages between energy, water, land, climate, and economic systems, *Geoscientific Model Development*, 12, 677–698, <https://doi.org/10.5194/gmd-12-677-2019>, 2019.
- 95 Fricko, O., Parkinson, S. C., Johnson, N., Strubegger, M., Vliet, M. T. van, and Riahi, K.: Energy sector water use implications of a 2 °C climate policy, *Environ. Res. Lett.*, 11, 034011, <https://doi.org/10.1088/1748-9326/11/3/034011>, 2016.
- Huang, Z., Hejazi, M., Li, X., Tang, Q., Vernon, C., Leng, G., Liu, Y., Döll, P., Eisner, S., and Gerten, D.: Reconstruction of global gridded monthly sectoral water withdrawals for 1971–2010 and analysis of their spatiotemporal patterns, *Hydrology and Earth System Sciences*, 22, 2117–2133, 2018.
- 100 Kim, S. H., Hejazi, M., Liu, L., Calvin, K., Clarke, L., Edmonds, J., Kyle, P., Patel, P., Wise, M., and Davies, E.: Balancing global water availability and use at basin scale in an integrated assessment model, *Climatic Change*, 136, 217–231, <https://doi.org/10.1007/s10584-016-1604-6>, 2016.
- Krey, V., Havlik, P., Kishimoto, P., Fricko, O., Zilliacus, J., Gidden, M., Strubegger, M., Kartasasmita, G., Ermolieva, T., and Forsell, N.: MESSAGEix-GLOBIOM Documentation-2020 release, 2020.
- 105 Masui, T., Matsumoto, K., Hijioka, Y., Kinoshita, T., Nozawa, T., Ishiwatari, S., Kato, E., Shukla, P. R., Yamagata, Y., and Kainuma, M.: An emission pathway for stabilization at 6 Wm-2 radiative forcing, *Climatic change*, 109, 59–76, 2011.
- Mouratiadou, I., Biewald, A., Pehl, M., Bonsch, M., Baumstark, L., Klein, D., Popp, A., Luderer, G., and Kriegler, E.: The impact of climate change mitigation on water demand for energy and food: An integrated analysis based on the Shared Socioeconomic Pathways, *Environmental Science & Policy*, 64, 48–58, <https://doi.org/10.1016/j.envsci.2016.06.007>, 2016.
- 110 Stehfest, E., van Vuuren, D., Bouwman, L., and Kram, T.: Integrated assessment of global environmental change with IMAGE 3.0: Model description and policy applications, Netherlands Environmental Assessment Agency (PBL), 2014.
- Steyaert, J. C., Condon, L. E., WD Turner, S., and Voisin, N.: ResOpsUS, a dataset of historical reservoir operations in the contiguous United States, *Scientific Data*, 9, 34, 2022.
- 115 Strzepek, K., Schlosser, A., Gueneau, A., Gao, X., Blanc, É., Fant, C., Rasheed, B., and Jacoby, H. D.: Modeling water resource systems within the framework of the MIT Integrated Global System Model: IGSM-WRS, *Journal of Advances in Modeling Earth Systems*, 5, 638–653, <https://doi.org/10.1002/jame.20044>, 2013.
